# Supplementary material
Source: publisher site journal article supplement (https://www.dovepress.com/article/587855)
Supplement: Supplementary file 1 [file 587855%20Supplementary%20Material.docx]

**Fig. S1**. The smooth fitting curve of APACHE II and CLEC4D.


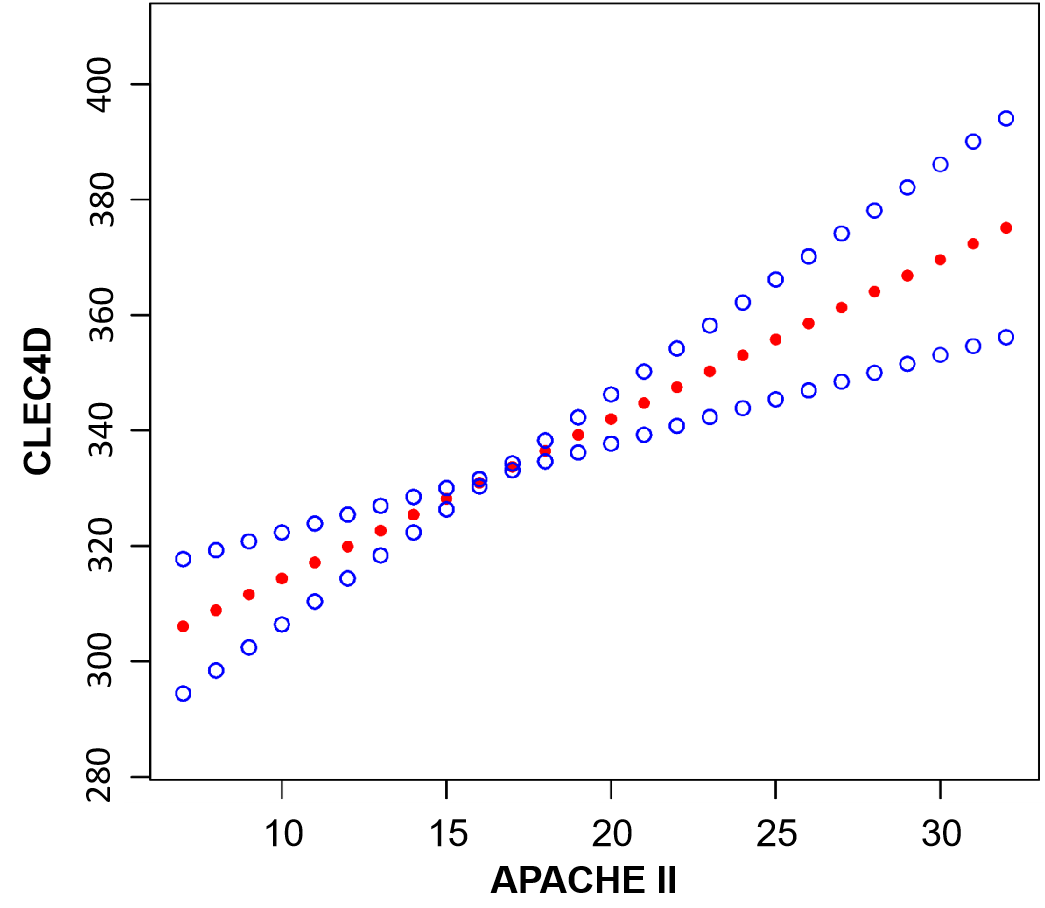


Note: APACHE: Acute Physiology and Chronic Health Evaluation, CLEC4D: C-type lectin domain family 4 member D, SOFA: Sequential Organ Failure Assessment.

The smooth fitting curve was adjusted for age, gender, diabetes mellitus, surgery, sepsis, and SOFA.

**Table S1**. Regression models between CLEC4D and APACHE II.

| β (95%CI) | Single-Factor Model | *P*-value | Muti-Factor Model | *P*-value |
| --- | --- | --- | --- | --- |
| CLEC4D | 0.019 (0.008, 0.030) | <0.001 | 0.016 (0.006, 0.026) | 0.002 |

Note: APACHE: Acute Physiology and Chronic Health Evaluation, CLEC4D: C-type lectin domain family 4 member D, CI: confidence interval. The multi-factor model was adjusted for age, gender, SOFA, diabetes mellitus, surgery, and sepsis.

**Table S2**. The threshold effect of CLEC4D and WBC.

|  | β (95% CI) | *P* value |
| --- | --- | --- |
| Linear model | 0.006 (-0.008, 0.019) | 0.409 |
| Curvilinear model |  |  |
| < 356.3 | 0.020 (-0.001, 0.041) | 0.063 |
| ≥ 356.3 | -0.022 (-0.056, 0.012) | 0.204 |
| Log-likelihood ratio test |  | 0.082 |

Note: CLEC4D: C-type lectin domain family 4 member D, WBC: white blood cell, CI: confidence interval. These models were adjusted for age, gender, AID, tumor, surgery, sepsis, and SOFA.
